# Supplementary material for: Role of interfacial interactions to control the extent of wrapping of polymer chains on multi-walled carbon nanotubes
Source: Royal Society of Chemistry journal article supplement (doi:10.1039/c6ra06258j), 2016-01-01
Supplement: c6ra06258j1.pdf [file c6ra06258j1.pdf]

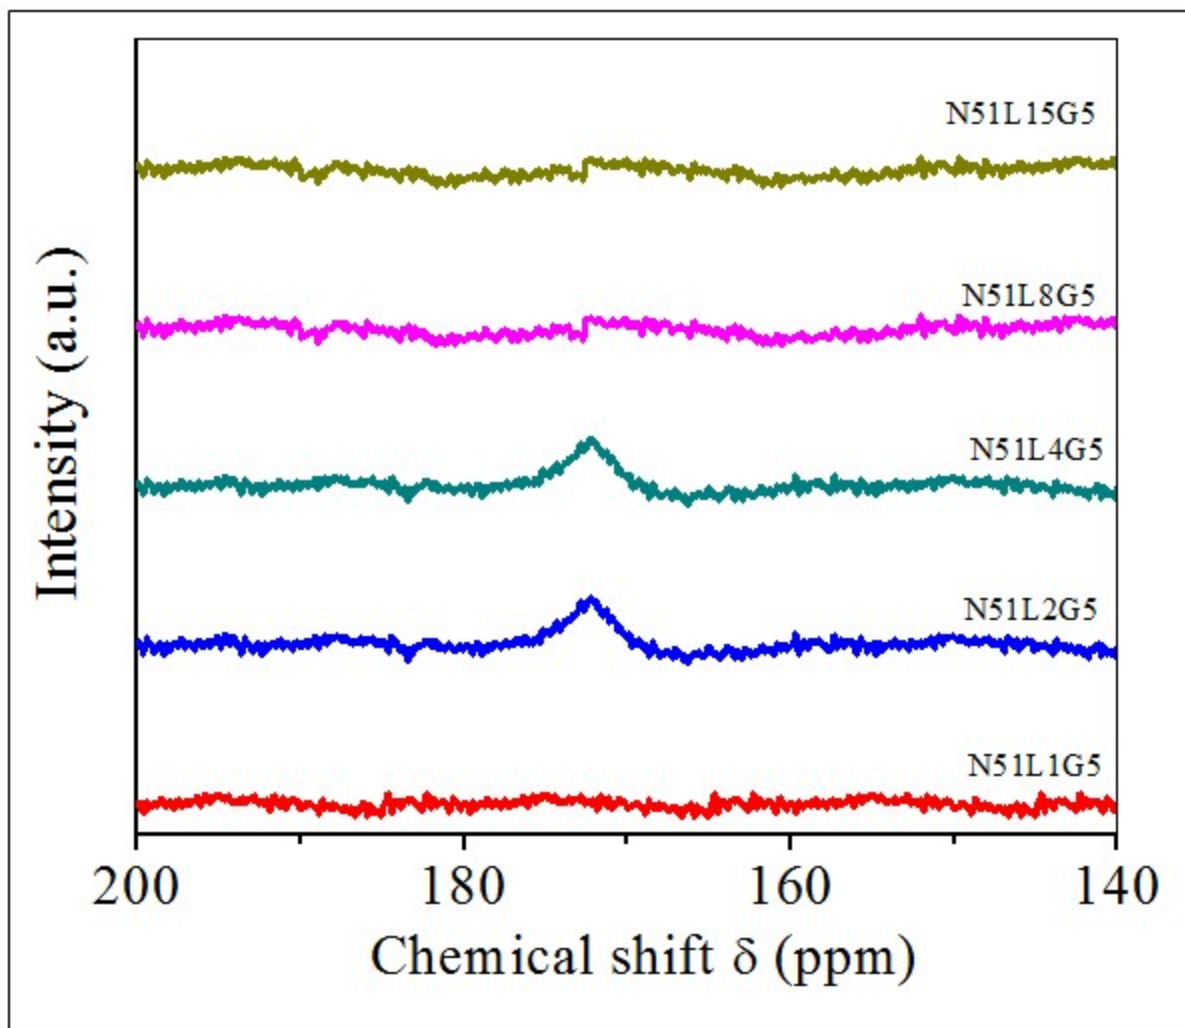

**Fig S1:** The zoomed-in image of NMR spectra of the separated MWCNT.

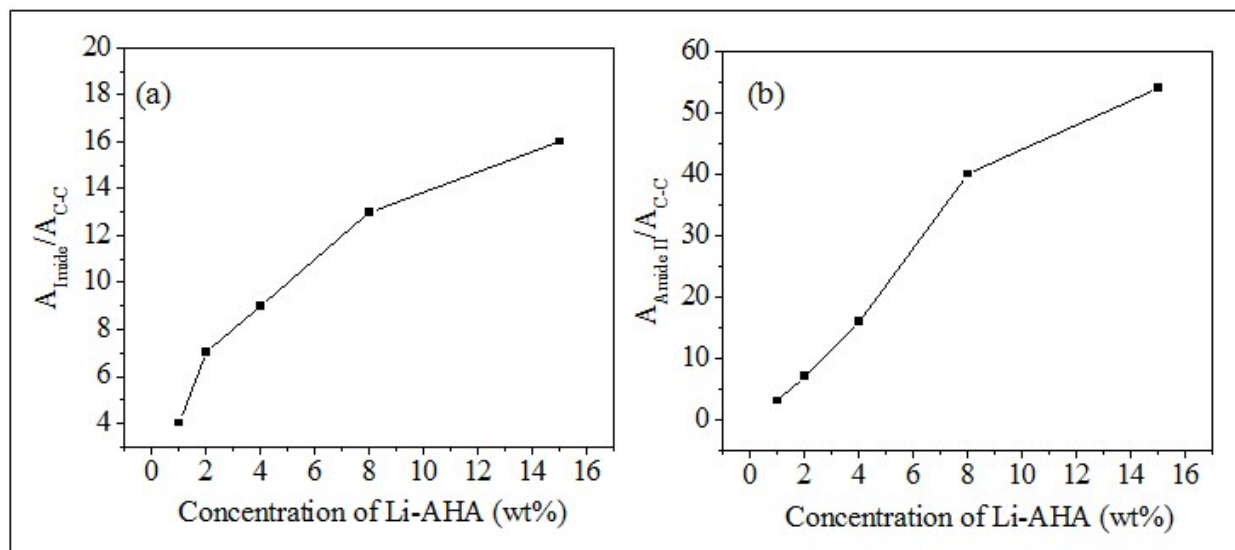

**Fig S2:** The relative peak area for (a) imide peak (b) -N-H bending peak to the peak at  $1115\text{ cm}^{-1}$  as a function of Li-AHA concentration.

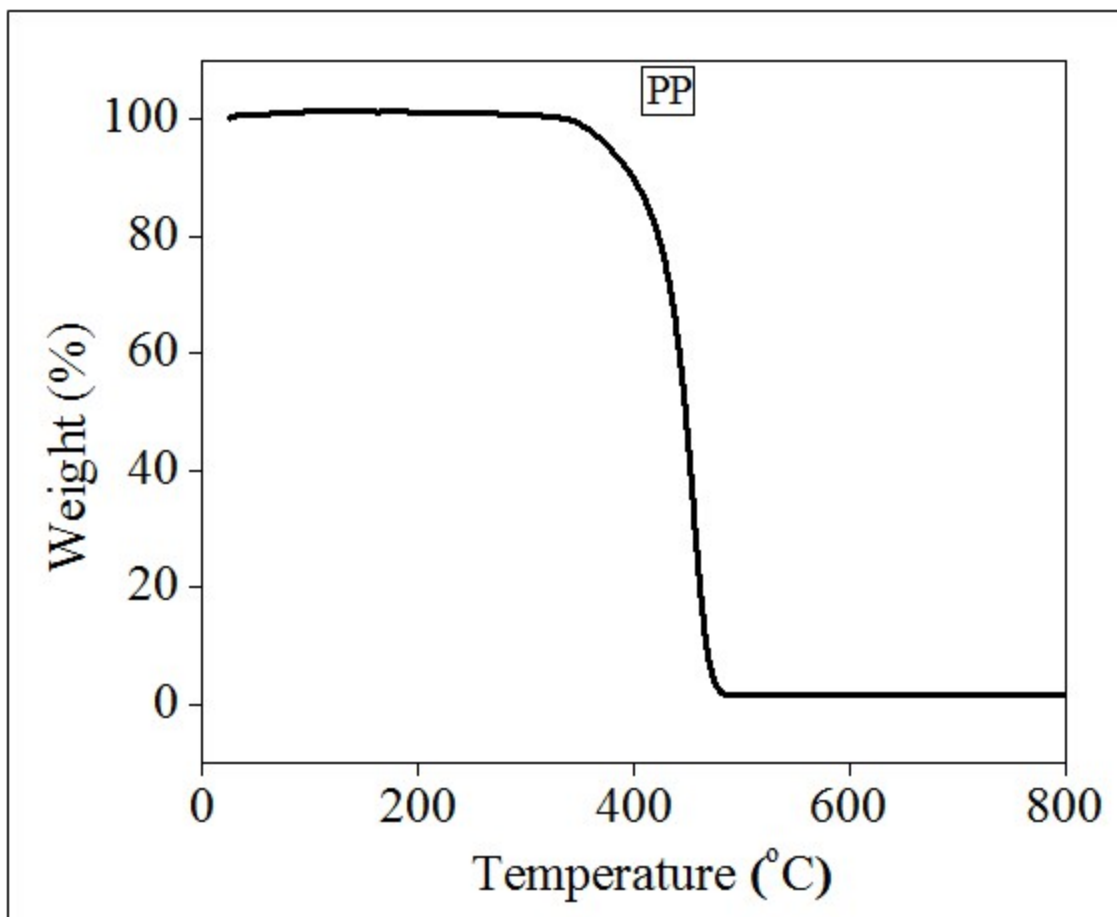

**Fig S3:** %Weight as a function of temperature for pure PP in N<sub>2</sub> environment during TGA.

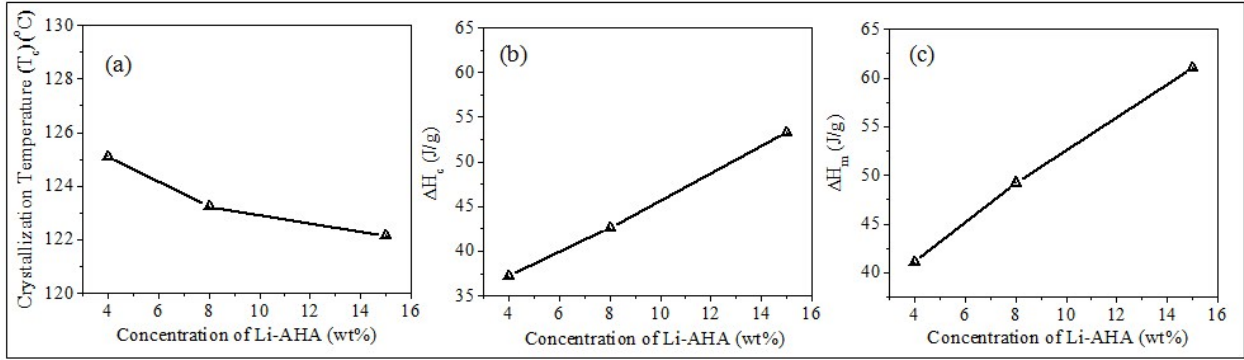

**Fig S4:** Variation of the (a) Crystallization temperature ( $T_c$ ), (b) Enthalpy of the crystallization exotherm ( $\Delta H_c$ ) and (c) Enthalpy of melting endotherm ( $\Delta H_m$ ) of the PP phase as a function of Li-AHA concentration in separated MWCNT.
